# Supplementary material for: Regional desynchronization of microglial activity is associated with cognitive decline in Alzheimer’s disease
Source: PubMed Central journal article supplement (PMC11375924; doi:10.1186/s13024-024-00752-6), 2024-09-05
Supplement: 13024_2024_752_MOESM1_ESM.pdf [file 13024_2024_752_MOESM1_ESM.pdf]

## Supplementary Materials for

### **Regional Desynchronization of Microglial Activity is Associated with Cognitive Decline in Alzheimer's Disease**

Artem Zatcepin et al.

\*Corresponding author: Artem Zatcepin. Email: Artem.Zatcepin@med.uni-muenchen.de

#### **This PDF file includes:**

Supplementary Figs. S1 to S9  
Supplementary Tables S1 to S6

Supplementary Fig. S1

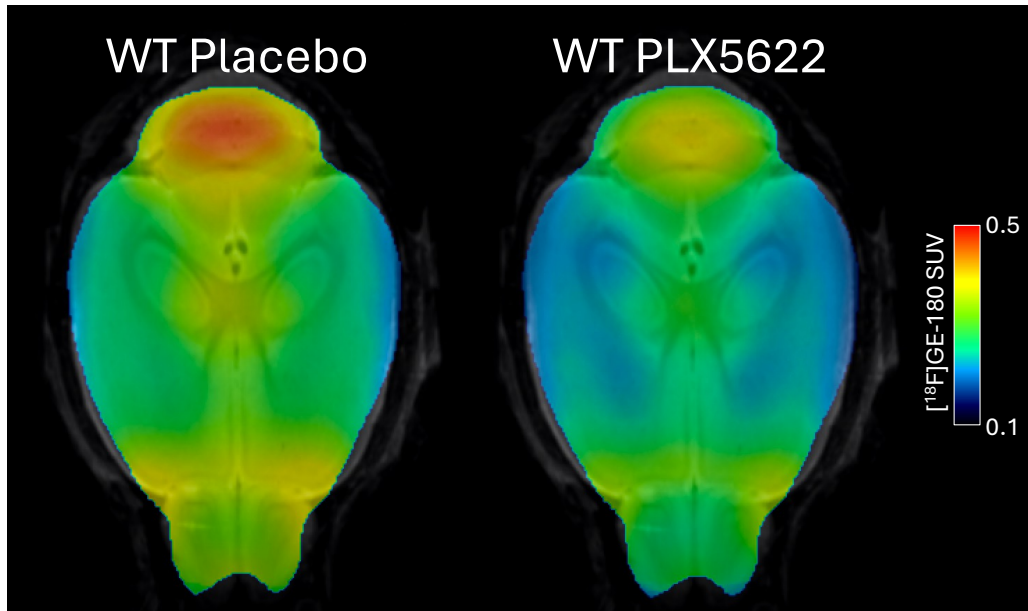

Supplementary Fig. S1. Mean SUV-scaled TSPO-PET uptake in microglia depletion experiment in WT mice. *Left*: mean uptake in mice that received a placebo injection, *right*: mean uptake in mice with microglia depleted using PLX5622.

Supplementary Fig. S2

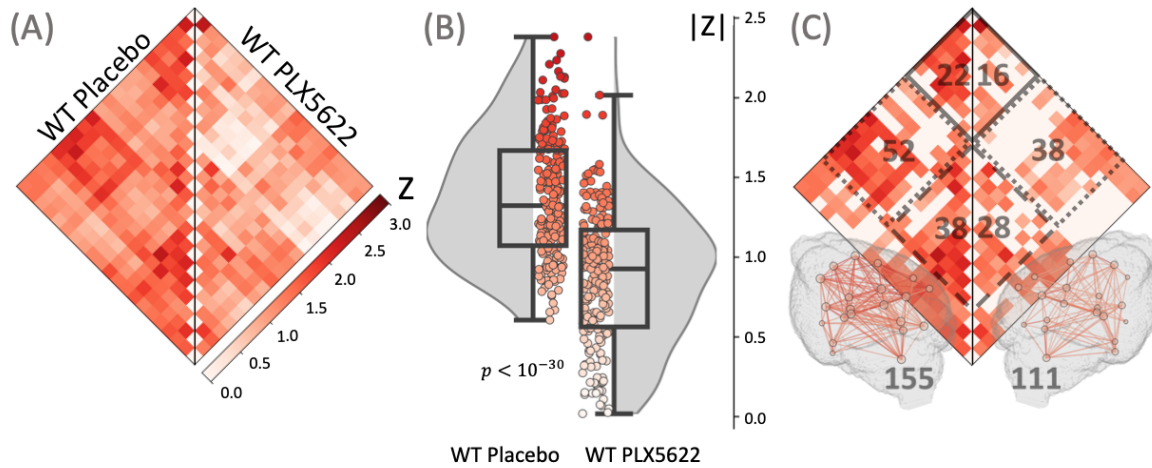

**Supplementary Fig. S2. Validation of the depletion experiment by myocardial normalization.** Plots show ICC heatmaps **(A)**, absolute ICC values **(B)** and significant connections **(C)** of the depletion experiment with myocardium adjusted standardized uptake values as an alternative normalization method. **(A)** ICC values are shown for all the pairs of the 21 VOIs. **(B)** Distribution of absolute ICCs is shown. **(C)** Significant connections ( $p < 0.005$ ), including cortical (solid line), subcortical (dashed line), and cortical-subcortical (dotted line) connections; the number of the corresponding connections is shown in gray. All significant connections are also projected into 3D brain images, where the color of the connection represents its value; the nodes are individual VOIs, the size of the node reflects the number of its connections; the total number of connections is shown in gray.

### Supplementary Fig. S3

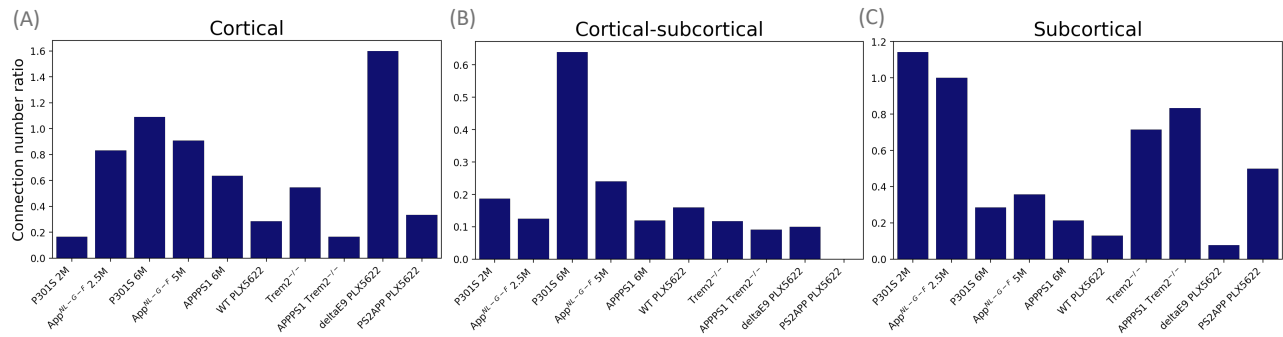

**Supplementary Fig. S3. Ratio of the number of connections in the investigated mouse cohorts relative to their corresponding reference cohorts. (A) Cortical connections, (B) cortical-subcortical connections, (C) subcortical connections. The name of each reference cohort can be found in Supplementary Table S4.**

Supplementary Fig. S4

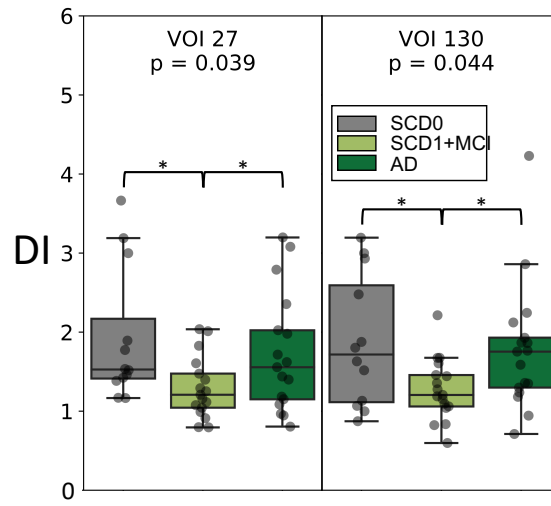

**Supplementary Fig. S4. Individual DIs calculated using motor and sensory cortex for cognitively normal and AD continuum subjects.** Only VOIs with significant differences in DI are shown. VOI 27 is located in the right postcentral gyrus; VOI 130 is located in the left postcentral gyrus. Unpaired t-test: \*  $p < 0.05$ , \*\*  $p < 0.01$ , \*\*\*  $p < 0.0001$ . The p-value of one-way ANOVA is shown on top of each plot.

Supplementary Fig. S5

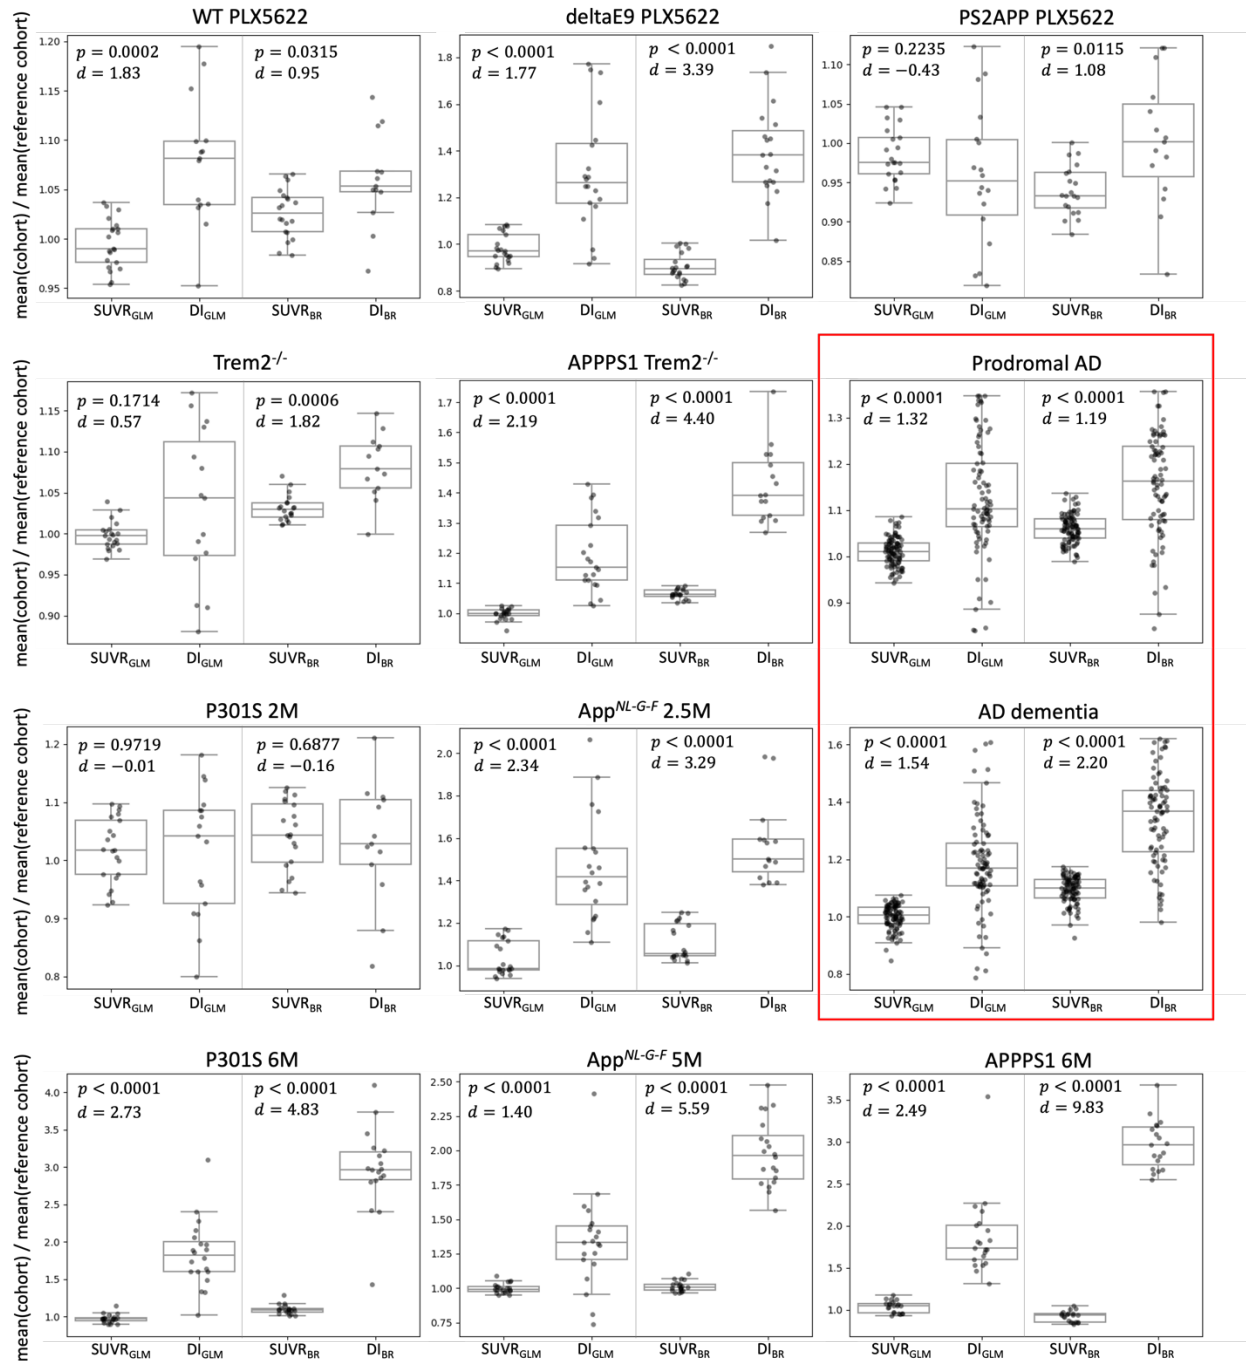

**Supplementary Fig. S5. DI compared to SUVR for the study cohorts.** The boxplots show the ratio between the mean value (mean SUVR or mean DI) in a cohort relative to its reference cohort (see **Supplementary Table S4** for reference). Every point is a single atlas region. GLM – global mean scaling, BR – best region scaling (see best region list in Supplementary Table S4). Red box indicates the human

cohorts, the rest are the mice cohorts.  $p$  is the  $p$ -value of the paired two-sided  $t$ -test,  $d$  is the corresponding value of Cohen's  $d$  (effect size).

Supplementary Fig. S6

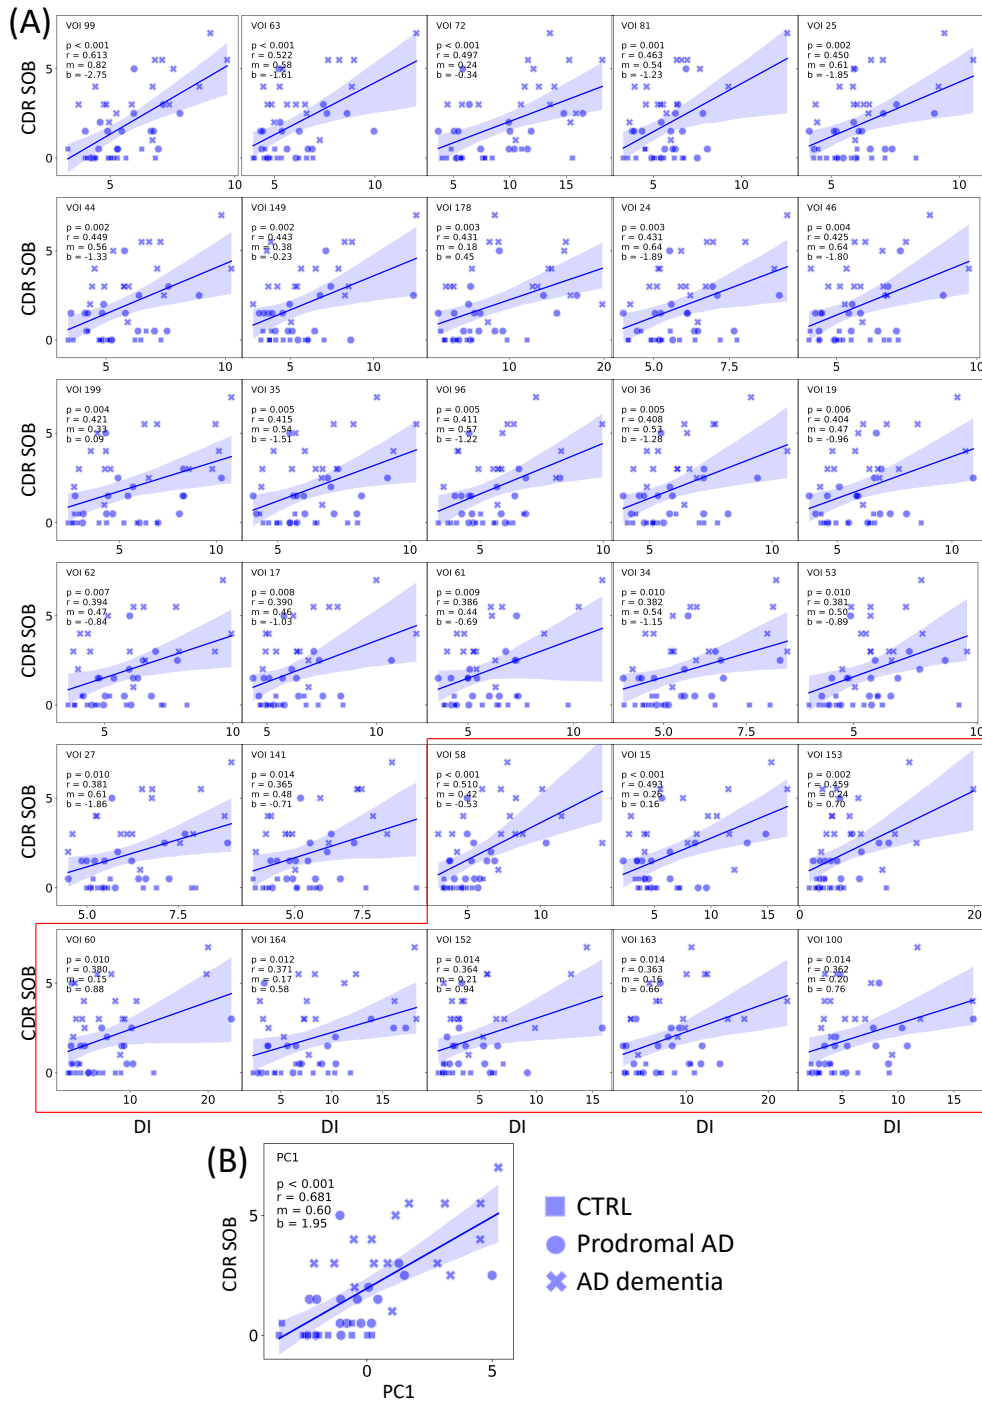

**Supplementary Fig. S6. Validation analysis using the cognitive dementia rating (CDR) index. (A)** Relationship between DI and CDR sum of boxes (SOB) score for VOIs with significant correlations after FDR correction. Temporal VOIs are indicated by the red box, the rest of the VOIs belong to the parietal lobe. **(B)** Relationship between the first principal component (PC1) calculated based on the VOIs with significant differences in DI compared to CTRL (**Fig. 6**) and CDR SOB. p is the correlation p-value (uncorrected), r is the Pearson's r, m is the slope of the fit, b is its intercept.



Supplementary Fig. S7

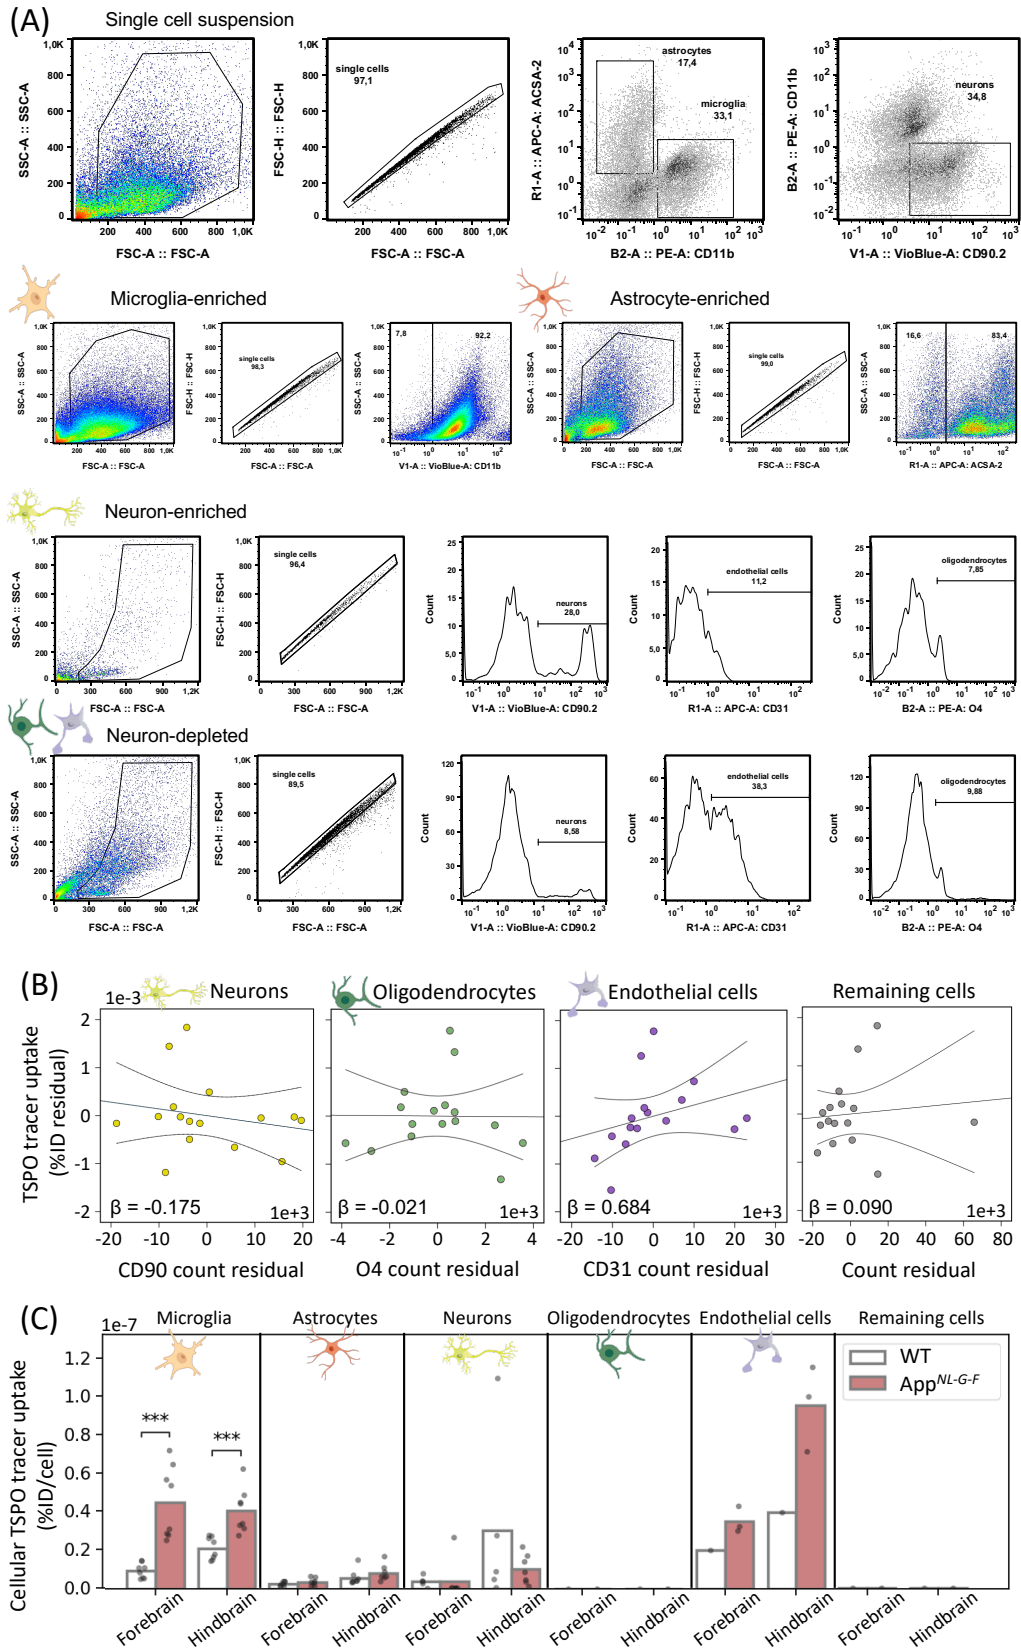

**Supplementary Fig. S7. Gating strategies and estimation of cellular TSPO tracer uptake beyond microglia and astrocytes.** **(A)** Upper row shows full-stain analysis of the single cell suspension to determine relative proportions of microglia, astrocytes, and neurons. Panels in the middle show quality control and determination of cell numbers in microglia and astrocyte enriched fractions. Lower two rows show gating strategy of neuron-enriched and neuron-depleted fractions, with a gradient in neuron and endothelial cell fractions. **(B)** Partial correlations between cell count of neurons (CD90.2), endothelial cells (CD31), oligodendrocytes (O4) and remaining cells (negative for all markers) as predictors and radioactivity in cell pellets as dependent variable, derived from regression.  $\beta$  = standardized regression coefficient. **(C)** Estimated cellular TSPO tracer uptake in microglia and astrocytes (both determined per cell in enriched fractions) as well as in neurons, oligodendrocytes, endothelial cells, and remaining cells (all determined by multiple regression). \*  $p \leq 0.05$ , \*\*  $p \leq 0.01$ , \*\*\*  $p \leq 0.001$ . Each point in the plots corresponds to a single mouse.

**Supplementary Fig. S8**

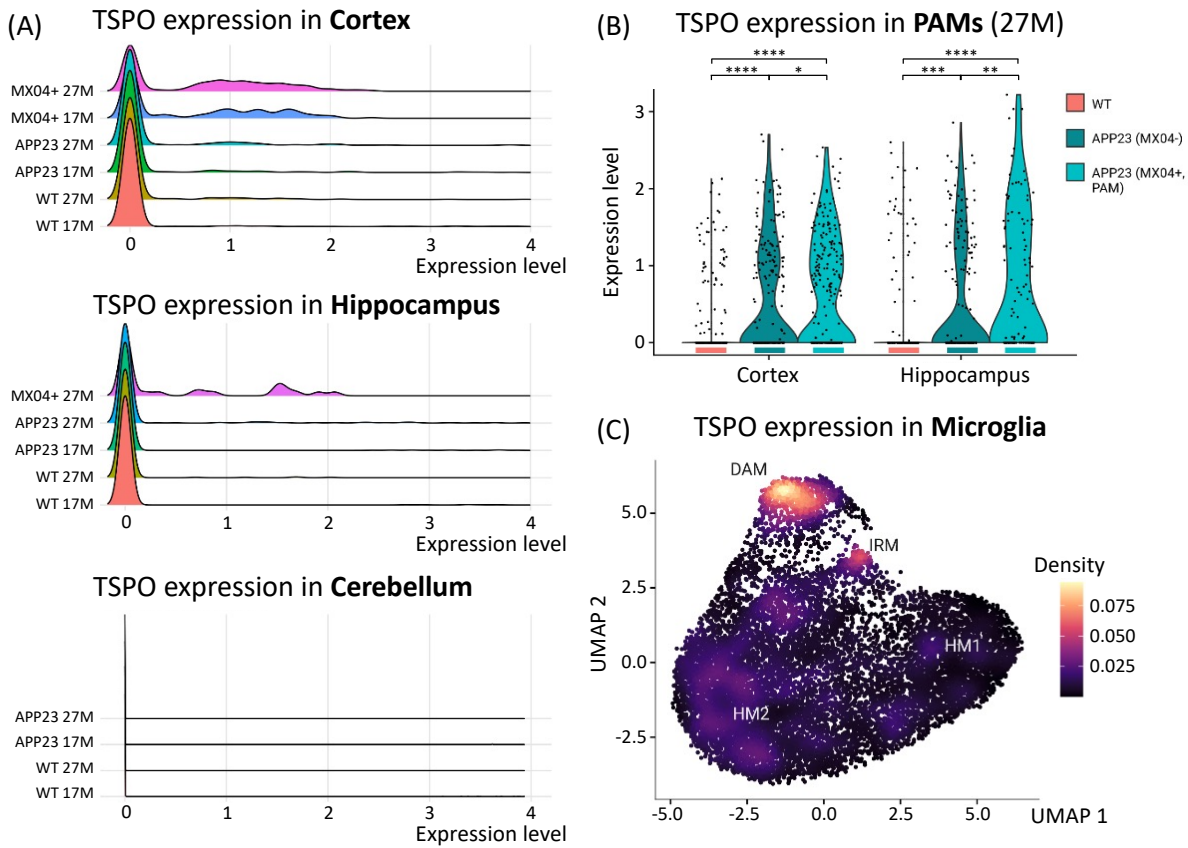

**Supplementary Fig. S8. Brain region- and A $\beta$  pathology-specific TSPO expression levels in microglia.**

**(A)** Ridge plots showing TSPO expression levels according to genotype and age. In the cortex of APP23 animals, where plaque pathology is pronounced, a subpopulation of microglia expresses high levels of TSPO; this population is enriched in plaque-associated microglia (PAMs; MX04+) both in 17- and 27-month-old animals. In the hippocampus, where plaques develop later, a clear increase in TSPO expression only becomes evident in 27-month-old plaque-associated microglial cells. In contrast, no TSPO expression is observed in microglia isolated from the cerebellum, where plaques never develop.

**(B)** Violin plot showing TSPO expression in cortical and hippocampal microglia from 27-month-old APP23 and wildtype animals. \*  $p < 0.05$ ; \*\*  $p < 0.01$ ; \*\*\*  $p < 0.001$ ; \*\*\*\*  $p < 0.0001$ .

**(C)** Density plot showing strongest enrichment for TSPO expression in microglial subpopulations associated with A $\beta$ -pathology. DAM = Disease associated microglia; IRM = Interferon response microglia; HM = Homeostatic microglia.

**Supplementary Fig. S9**

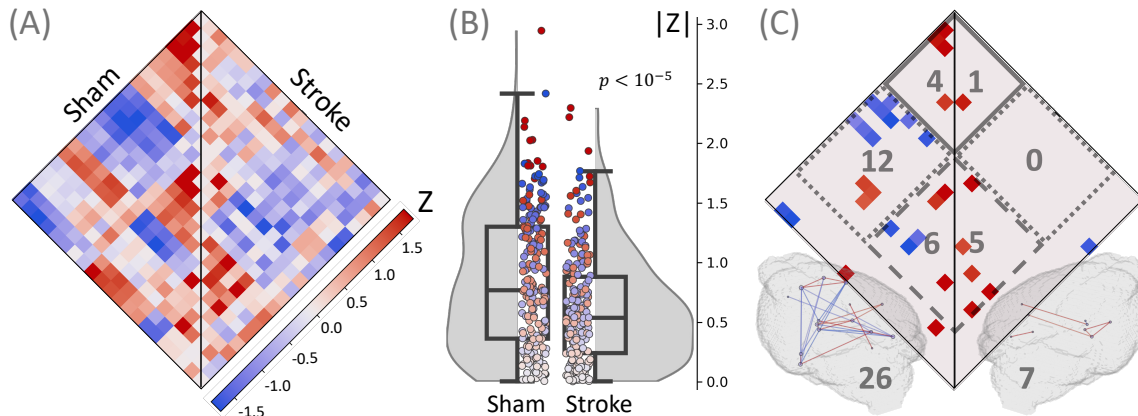

**Supplementary Fig. S9. Microglia desynchronization in acute ischemic stroke model 7 days after surgery.** Plots show ICC heatmaps, absolute ICC values and significant connections of the sham mice (n=6) and mice with photothrombotic stroke (n=6). **(A)** ICC values for all the pairs of the 21 VOIs. **(B)** Distributions of absolute ICCs, p-values derive from a Wilcoxon signed-rank test. **(C)** Significant connections ( $p < 0.005$ ), including cortical (solid line), subcortical (dashed line), and cortical-subcortical (dotted line) connections; the number of the corresponding connections is shown in gray. All significant connections are also projected into 3D brain images, where the color of the connection represents its value; the nodes are individual VOIs, the size of the node reflects the number of its connections; the total number of connections is shown in gray.

**Supplementary Table S1**

| Species | Cohort name                 | Cohort description                                                          | Sex    | Number of subjects | Age, months |
|---------|-----------------------------|-----------------------------------------------------------------------------|--------|--------------------|-------------|
| Mouse   | WT Placebo                  | WT with placebo treatment for seven weeks                                   | Female | 14                 | 6-9         |
| Mouse   | WT PLX5622                  | WT with PLX5622 treatment for seven weeks                                   | Female | 14                 | 6-9         |
| Mouse   | TREM2 <sup>+/+</sup>        | WT with intact TREM2 gene                                                   | Female | 17                 | 12          |
| Mouse   | TREM2 <sup>-/-</sup>        | WT with TREM2 knock-out                                                     | Female | 17                 | 12          |
| Mouse   | APPPS1 Trem2 <sup>+/+</sup> | Transgenic A $\beta$ mouse model with intact TREM gene                      | Female | 11                 | 12          |
| Mouse   | APPPS1 Trem2 <sup>-/-</sup> | Transgenic A $\beta$ mouse model with TREM2 knock-out                       | Female | 11                 | 12          |
| Mouse   | WT 2M                       | WT                                                                          | Female | 12                 | 2           |
| Mouse   | P301S 2M                    | Tau mouse model at earliest stage of tau aggregation                        | Female | 12                 | 2           |
| Mouse   | App <sup>NL-G-F</sup> 2.5M  | APP knock-in A $\beta$ mouse model at earliest stage of plaque deposition   | Female | 12                 | 2.5         |
| Mouse   | WT 6M                       | WT                                                                          | Female | 14                 | 6           |
| Mouse   | P301S 6M                    | Tau mouse model at a stage of established tau aggregation                   | Female | 14                 | 6           |
| Mouse   | App <sup>NL-G-F</sup> 5M    | APP knock-in A $\beta$ mouse model at a stage of moderate plaque deposition | Female | 14                 | 5           |
| Mouse   | APPPS1 6M                   | Transgenic A $\beta$ mouse model at a stage of moderate plaque deposition   | Female | 14                 | 6           |
| Mouse   | PS2APP<br>Placebo           | Transgenic A $\beta$ mouse model with placebo treatment for seven weeks     | Female | 10                 | 11.5        |
| Mouse   | PS2APP<br>PLX5622           | Transgenic A $\beta$ mouse model with PLX5622 treatment for seven weeks     | Female | 10                 | 11.5        |
| Mouse   | deltaE9<br>Placebo          | Transgenic A $\beta$ mouse model with placebo treatment for four weeks      | Female | 8                  | 5.5-6.5     |
| Mouse   | deltaE9<br>PLX5622          | Transgenic A $\beta$ mouse model with PLX5622 treatment for four weeks      | Female | 8                  | 5.5-6.5     |
| Mouse   | Sham                        | WT mice 7d after sham surgery                                               | Male   | 6                  | 2-2.5       |

|       |                                           |                                                     |        |   |       |
|-------|-------------------------------------------|-----------------------------------------------------|--------|---|-------|
| Mouse | Stroke                                    | WT mice 7 days after photothrombotic stroke surgery | Male   | 6 | 2-2.5 |
| Mouse | WT (scRadiotracing)                       | WT                                                  | Female | 8 | 6-7   |
| Mouse | App <sup>NL-G-F</sup><br>(scRadiotracing) | APP knock-in A $\beta$ mouse model                  | Female | 8 | 6-7   |

**Supplementary Table S1. Overview on preclinical cohorts.** Shading shows cohorts that were compared to each other.

**Supplementary Table S2**

|                        | CTRL train                       | CTRL test                          | Prodromal AD                     | AD dementia                       | ANOVA F-value (p-value)     |
|------------------------|----------------------------------|------------------------------------|----------------------------------|-----------------------------------|-----------------------------|
| n                      | 13                               | 12                                 | 17                               | 17                                |                             |
| Age (years)            | 42.7 ± 19.4                      | 72.7 ± 4.2                         | 68.5 ± 7.3                       | 71.3 ± 7.3                        | 22.97 (<10 <sup>-9</sup> )  |
| Sex                    | ♀ 11 / ♂ 2                       | ♀ 7 / ♂ 5                          | ♀ 7 / ♂ 10                       | ♀ 13 / ♂ 4                        | 2.71 (0.05)                 |
| rs6971 SNP             | MAB: 8<br>HAB: 5<br>(n=13)       | MAB: 8<br>HAB: 4<br>(n=12)         | MAB: 10<br>HAB: 7<br>(n=17)      | MAB: 13<br>HAB: 4<br>(n=17)       | 1.02 (0.39)                 |
| rs429358 ApoE1 pos 112 | CC: 0<br>CT: 2<br>TT: 1<br>(n=3) | CC: 0<br>CT: 2<br>TT: 10<br>(n=12) | CC: 2<br>CT: 3<br>TT: 3<br>(n=8) | CC: 2<br>CT: 7<br>TT: 3<br>(n=12) | 3.45 (0.03)                 |
| rs7412 ApoE2 pos 158   | CC: 3<br>CT: 0<br>(n=3)          | CC: 10<br>CT: 2<br>(n=12)          | CC: 8<br>CT: 0<br>(n=8)          | CC: 12<br>CT: 0<br>(n=12)         | 1.36 (0.27)                 |
| sTREM2                 | n.a.                             | 10.9 ± 3.1<br>(n=6)                | 10.2 ± 2.0<br>(n=7)              | 11.2 ± 3.5<br>(n=10)              | 0.49 (0.07)                 |
| MMSE                   | 29.5 ± 0.6<br>(n=4)              | 29.1 ± 1.1<br>(n=12)               | 27.9 ± 1.7<br>(n=17)             | 22.7 ± 2.6<br>(n=17)              | 36.49 (<10 <sup>-11</sup> ) |
| CDR SOB                | 0.13 ± 0.25<br>(n=4)             | 0.08 ± 0.20<br>(n=12)              | 1.44 ± 1.31<br>(n=17)            | 3.81 ± 1.56<br>(n=16)             | 26.41 (<10 <sup>-9</sup> )  |

**Supplementary Table S2. Overview on training and test cohorts of the human study.** CTRL = healthy control; AD = Alzheimer's disease; ANOVA = analysis of variance; SNP = single nucleotide polymorphism; ApoE = Apolipoprotein E; sTREM2 = soluble triggering receptor expressed on myeloid cells type 2; MMSE = mini-mental-state-examination; CDR SOB = cognitive dementia rating sum of boxes

**Supplementary Table S3**

| <b>Network</b>       | <b>Region</b>            | <b>Schaefer VOIs</b>                                                                                                                                                                                                                                                                  |
|----------------------|--------------------------|---------------------------------------------------------------------------------------------------------------------------------------------------------------------------------------------------------------------------------------------------------------------------------------|
| <b>AD signature</b>  | Parietal lobe            | 6, 17, 19, 23, 24, 25, 27, 33, 34, 35, 36, 37, 38, 39, 40, 44, 45, 46, 53, 61, 62, 63, 72, 79, 81, 82, 96, 97, 98, 99, 107, 110, 115, 119, 121, 124, 127, 128, 130, 132, 137, 138, 139, 140, 141, 142, 143, 144, 149, 150, 157, 165, 166, 167, 177, 178, 182, 183, 184, 198, 199, 200 |
|                      | Temporal lobe            | 15, 16, 31, 32, 57, 58, 59, 60, 64, 74, 75, 76, 77, 78, 100, 101, 102, 116, 117, 135, 148, 152, 153, 162, 163, 164, 168, 185, 186, 187, 188, 189                                                                                                                                      |
| <b>Motor-sensory</b> | Precentral gyrus         | 21, 26, 30, 43, 129, 145, 151                                                                                                                                                                                                                                                         |
|                      | Supplementary motor area | 54, 95, 126, 158                                                                                                                                                                                                                                                                      |
|                      | Paracentral lobule       | 29, 133                                                                                                                                                                                                                                                                               |
|                      | Postcentral gyrus        | 20, 23, 24, 25, 27, 122, 124, 125, 127, 128, 130, 134, 137, 139                                                                                                                                                                                                                       |

**Supplementary Table S3. Definition of AD-signature and motor-sensory network regions.** Volume of interest (VOI) numbers are provided for all included regions.



## Supplementary Table S4

| Cohort                      | Reference cohort            | p-value<br>DI <sub>GLM</sub> vs<br>SUVR <sub>GLM</sub> | Cohen's d<br>DI <sub>GLM</sub> vs<br>SUVR <sub>GLM</sub> | p-value<br>DI <sub>BR</sub> vs<br>SUVR <sub>BR</sub> | Cohen's d<br>DI <sub>BR</sub> vs<br>SUVR <sub>BR</sub> | Best region (BR) name      |
|-----------------------------|-----------------------------|--------------------------------------------------------|----------------------------------------------------------|------------------------------------------------------|--------------------------------------------------------|----------------------------|
| WT PLX5622                  | WT Placebo                  | 0.0002                                                 | 1.83                                                     | 0.0315                                               | 0.95                                                   | Cerebellum                 |
| deltaE9<br>PLX5622          | deltaE9 Placebo             | <0.0001                                                | 1.77                                                     | <0.0001                                              | 3.39                                                   | Brain stem                 |
| PS2APP<br>PLX5622           | PS2APP Placebo              | 0.2235                                                 | -0.43                                                    | 0.0115                                               | 1.08                                                   | Brain stem                 |
| Trem2 <sup>-/-</sup>        | Trem2 <sup>+/+</sup>        | 0.1714                                                 | 0.57                                                     | 0.0006                                               | 1.82                                                   | Thalamus left              |
| APPPS1 Trem2 <sup>-/-</sup> | APPPS1 Trem2 <sup>+/+</sup> | <0.0001                                                | 2.19                                                     | <0.0001                                              | 4.40                                                   | Auditory cortex right      |
| P301S 2M                    | WT 2M                       | 0.9719                                                 | -0.01                                                    | 0.6877                                               | -0.16                                                  | Brain stem                 |
| App <sup>NL-G-F</sup> 2.5M  | WT 2M                       | <0.0001                                                | 2.34                                                     | <0.0001                                              | 3.29                                                   | Brain stem                 |
| P301S 6M                    | WT 6M                       | <0.0001                                                | 2.73                                                     | <0.0001                                              | 4.83                                                   | Somatosensory cortex right |
| App <sup>NL-G-F</sup> 5M    | WT 6M                       | 0.0001                                                 | 1.40                                                     | <0.0001                                              | 5.59                                                   | Somatosensory cortex right |
| APPPS1 6M                   | WT 6M                       | <0.0001                                                | 2.49                                                     | <0.0001                                              | 9.83                                                   | Somatosensory cortex right |
| Prodromal AD                | CTRL test                   | <0.0001                                                | 1.32                                                     | <0.0001                                              | 1.19                                                   | Schaefer 24                |
| AD dementia                 | CTRL test                   | <0.0001                                                | 1.54                                                     | <0.0001                                              | 2.20                                                   | Schaefer 24                |

**Supplementary Table S4. DI compared to SUVR for study cohorts.** GLM – global mean scaling, BR – best region scaling.

Supplementary Table S5

| Region | Intercept  | Slope      | r          | p          | P <sub>FDR</sub> |
|--------|------------|------------|------------|------------|------------------|
| 58     | 30.9356525 | -0.7903221 | -0.5446341 | 9.1118E-05 | 0.00856505       |
| 72     | 30.4827304 | -0.4355204 | -0.5210918 | 0.00020478 | 0.00962485       |
| 153    | 28.7173935 | -0.460459  | -0.5064532 | 0.00032911 | 0.01031198       |
| 178    | 29.1236188 | -0.3401915 | -0.4641679 | 0.00115667 | 0.02718176       |
| 99     | 32.5858166 | -1.0955367 | -0.4635156 | 0.00117786 | 0.02214382       |
| 149    | 29.9731419 | -0.6514939 | -0.4251488 | 0.00322653 | 0.05054892       |
| 199    | 29.4655864 | -0.5632666 | -0.4230137 | 0.0034013  | 0.04567455       |
| 152    | 28.2217828 | -0.3971198 | -0.4058564 | 0.00513484 | 0.06033436       |
| 61     | 30.8376741 | -0.7506634 | -0.3946425 | 0.00664634 | 0.0694173        |
| 121    | 29.0570229 | -0.395672  | -0.391596  | 0.00711838 | 0.06691277       |
| 96     | 31.4689874 | -0.9229614 | -0.382642  | 0.0086777  | 0.07415485       |
| 15     | 28.7163243 | -0.358487  | -0.3808446 | 0.00902394 | 0.07068755       |
| 34     | 31.4769068 | -0.9082752 | -0.362133  | 0.013395   | 0.09685616       |
| 24     | 31.9522884 | -0.9390339 | -0.3620483 | 0.01341831 | 0.09009434       |
| 63     | 30.6117109 | -0.7080303 | -0.3595632 | 0.01411747 | 0.0884695        |
| 27     | 32.631063  | -1.0114729 | -0.3588963 | 0.0143103  | 0.08407302       |
| 150    | 29.254826  | -0.5760147 | -0.3581167 | 0.01453854 | 0.08038957       |
| 44     | 30.891446  | -0.7887625 | -0.35609   | 0.01514644 | 0.07909808       |
| 81     | 30.593627  | -0.7316611 | -0.3556492 | 0.0152815  | 0.0756032        |
| 25     | 31.5995283 | -0.8552708 | -0.3553469 | 0.0153747  | 0.07226107       |
| 64     | 28.6446634 | -0.4553819 | -0.3553323 | 0.01537922 | 0.06884031       |
| 163    | 28.5103653 | -0.2828606 | -0.3552258 | 0.01541216 | 0.06585198       |
| 62     | 30.6411167 | -0.7390494 | -0.3494415 | 0.0172946  | 0.0706823        |
| 157    | 29.2317563 | -0.5269459 | -0.3405865 | 0.02055164 | 0.0804939        |
| 110    | 29.1877971 | -0.4286028 | -0.3374036 | 0.02184202 | 0.08212598       |
| 97     | 30.30276   | -0.7007449 | -0.3308979 | 0.02469195 | 0.08927089       |
| 60     | 27.85652   | -0.2289824 | -0.3180232 | 0.03125256 | 0.10880522       |
| 36     | 30.687463  | -0.7238685 | -0.3139604 | 0.03360042 | 0.11280141       |
| 46     | 31.1628132 | -0.8342803 | -0.3126286 | 0.03440102 | 0.11150675       |
| 23     | 31.0910477 | -0.767319  | -0.3122518 | 0.03463038 | 0.10850852       |
| 17     | 30.460663  | -0.6503287 | -0.3097701 | 0.03617263 | 0.10968474       |
| 35     | 30.6742558 | -0.6918098 | -0.2978606 | 0.04438009 | 0.13036651       |
| 128    | 29.4756865 | -0.4793251 | -0.2972416 | 0.04484504 | 0.12774042       |
| 19     | 30.0290492 | -0.6004747 | -0.2940231 | 0.04732694 | 0.13084507       |
| 53     | 30.0910173 | -0.6616066 | -0.2923973 | 0.04862236 | 0.13058576       |
| 162    | 28.1006796 | -0.2618433 | -0.2916502 | 0.04922721 | 0.12853773       |
| 141    | 30.0236593 | -0.6735091 | -0.2900856 | 0.05051367 | 0.12833201       |
| 98     | 29.6385615 | -0.5174567 | -0.2871168 | 0.0530294  | 0.1311178        |
| 74     | 28.0672182 | -0.279582  | -0.2789492 | 0.06047518 | 0.14576069       |
| 33     | 30.0643601 | -0.5869175 | -0.2694296 | 0.07018444 | 0.16493344       |
| 119    | 29.2832372 | -0.4886748 | -0.2671438 | 0.07269039 | 0.16665602       |
| 79     | 29.4017189 | -0.5164392 | -0.262044  | 0.07853617 | 0.17577143       |
| 177    | 28.2393617 | -0.3501029 | -0.2552796 | 0.08685247 | 0.18986355       |
| 102    | 27.5943651 | -0.2345449 | -0.2547086 | 0.08758472 | 0.1871128        |
| 45     | 29.4008726 | -0.518773  | -0.233867  | 0.11774906 | 0.2459647        |
| 130    | 28.7060486 | -0.3732233 | -0.2310986 | 0.12228509 | 0.24988692       |
| 189    | 27.4866959 | -0.2132722 | -0.2223825 | 0.13742866 | 0.27485731       |
| 198    | 28.1367951 | -0.3418839 | -0.2186673 | 0.14429175 | 0.28257134       |
| 39     | 29.1997679 | -0.4270309 | -0.2177821 | 0.14596383 | 0.28001224       |
| 167    | 27.7657052 | -0.2907528 | -0.2034404 | 0.17508082 | 0.32915194       |
| 168    | 27.743793  | -0.3100178 | -0.202413  | 0.17731674 | 0.32681909       |
| 127    | 28.8960239 | -0.4317138 | -0.2014026 | 0.17953546 | 0.32454487       |
| 164    | 27.498498  | -0.1501674 | -0.1894462 | 0.20731539 | 0.36769145       |
| 6      | 28.6291292 | -0.3337553 | -0.1835304 | 0.22212022 | 0.38665371       |
| 78     | 24.992992  | 0.30538126 | 0.17824004 | 0.23596513 | 0.40328586       |
| 187    | 25.0740578 | 0.26692945 | 0.17238472 | 0.25196277 | 0.42293751       |
| 139    | 28.5365048 | -0.4004626 | -0.1662161 | 0.2695891  | 0.44458553       |
| 185    | 27.0626535 | -0.1173273 | -0.1631517 | 0.27864207 | 0.45159232       |
| 57     | 27.3501292 | -0.1265963 | -0.1631276 | 0.27871403 | 0.44405286       |
| 32     | 27.2273147 | -0.1816098 | -0.1526298 | 0.31122949 | 0.48759288       |
| 101    | 27.1866498 | -0.1394166 | -0.1502595 | 0.31889238 | 0.49140793       |
| 117    | 27.2957386 | -0.1849629 | -0.1483604 | 0.32511714 | 0.49291953       |
| 188    | 26.9757239 | -0.137941  | -0.1423476 | 0.34532508 | 0.51524694       |

|     |            |            |            |            |            |
|-----|------------|------------|------------|------------|------------|
| 76  | 25.4040859 | 0.18258159 | 0.14092522 | 0.35021591 | 0.51437962 |
| 40  | 27.9692832 | -0.2363412 | -0.1383467 | 0.35919    | 0.519444   |
| 100 | 27.0736027 | -0.1318155 | -0.1378348 | 0.3609879  | 0.51413428 |
| 77  | 27.2623178 | -0.1537046 | -0.1369523 | 0.36410047 | 0.51082752 |
| 135 | 25.5112344 | 0.11924736 | 0.13641557 | 0.36600124 | 0.50594289 |
| 37  | 28.15043   | -0.2691805 | -0.1341539 | 0.37407682 | 0.50961189 |
| 138 | 27.440721  | -0.1819768 | -0.1312746 | 0.38451    | 0.516342   |
| 132 | 27.4844684 | -0.1716359 | -0.1306072 | 0.38695263 | 0.51230348 |
| 183 | 27.2852323 | -0.2014453 | -0.128898  | 0.39324945 | 0.51340901 |
| 82  | 27.648506  | -0.2338104 | -0.1245841 | 0.40940692 | 0.52718151 |
| 124 | 27.7492934 | -0.2306646 | -0.1186126 | 0.43239055 | 0.54925286 |
| 107 | 27.4739943 | -0.1812577 | -0.1176935 | 0.43599061 | 0.54644157 |
| 144 | 27.1534455 | -0.1047963 | -0.1157157 | 0.44379457 | 0.54890382 |
| 200 | 27.2069393 | -0.1670852 | -0.1084754 | 0.47300979 | 0.57744052 |
| 143 | 25.416806  | 0.12654911 | 0.1048674  | 0.4879409  | 0.58803134 |
| 75  | 27.0558088 | -0.1215342 | -0.1015561 | 0.50185715 | 0.59714648 |
| 115 | 27.3505031 | -0.1852538 | -0.0883843 | 0.55915339 | 0.65700523 |
| 148 | 26.7889938 | -0.0956412 | -0.0869391 | 0.56562175 | 0.65640055 |
| 137 | 27.0560502 | -0.140429  | -0.0812231 | 0.59153771 | 0.6781042  |
| 140 | 25.6056308 | 0.08841912 | 0.07656327 | 0.61304623 | 0.69429332 |
| 165 | 26.9773467 | -0.1088816 | -0.0737996 | 0.62595805 | 0.70047686 |
| 38  | 27.0597216 | -0.113058  | -0.0651289 | 0.66717641 | 0.73781862 |
| 186 | 26.8409446 | -0.1058772 | -0.0602129 | 0.69099462 | 0.75527319 |
| 182 | 26.6973309 | -0.0699509 | -0.0492568 | 0.74512079 | 0.80507303 |
| 31  | 26.6982468 | -0.0616684 | -0.0459126 | 0.76190186 | 0.81384972 |
| 59  | 26.0647586 | 0.02672254 | 0.03526913 | 0.81599739 | 0.86183994 |
| 184 | 26.529276  | -0.0361046 | -0.0310468 | 0.83770974 | 0.87494129 |
| 16  | 26.4967809 | -0.0340768 | -0.0211239 | 0.88918004 | 0.91849367 |
| 116 | 26.2553975 | 0.00972065 | 0.00849595 | 0.95531194 | 0.97607959 |
| 142 | 26.2249227 | 0.01263649 | 0.00810395 | 0.95737189 | 0.96766621 |
| 166 | 26.3484177 | -0.0071623 | -0.0073629 | 0.96126666 | 0.96126666 |

**Supplementary Table S5. Linear fit parameters for DI versus MMSE score for all investigated VOIs.**  $r$  is the Pearson's  $r$ ,  $p$  is the uncorrected  $p$ -value,  $p_{FDR}$  is the  $p$ -value after FDR correction. Significant correlations ( $p < 0.05$ ) are shown in italics, correlations that remained significant after FDR correction ( $p_{FDR} < 0.05$ ) are shown in bold. The regions are sorted according to their  $p$ -value.

Supplementary Table S6

| Region | Intercept | Slope    | r        | p        | p <sub>FDR</sub> |
|--------|-----------|----------|----------|----------|------------------|
| 99     | -2.75186  | 0.817361 | 0.612738 | 7.68E-06 | 0.000722         |
| 63     | -1.60849  | 0.583716 | 0.521634 | 0.000238 | 0.011195         |
| 58     | -0.53454  | 0.41749  | 0.509781 | 0.000348 | 0.010892         |
| 72     | -0.34377  | 0.239384 | 0.497127 | 0.000513 | 0.01205          |
| 15     | 0.158665  | 0.261391 | 0.492987 | 0.00058  | 0.010912         |
| 81     | -1.22868  | 0.540065 | 0.463241 | 0.001353 | 0.021193         |
| 153    | 0.698132  | 0.236384 | 0.458927 | 0.00152  | 0.020411         |
| 25     | -1.85355  | 0.61108  | 0.450211 | 0.001915 | 0.022498         |
| 44     | -1.33294  | 0.561131 | 0.449081 | 0.001972 | 0.020597         |
| 149    | -0.22755  | 0.382198 | 0.44296  | 0.00231  | 0.021711         |
| 178    | 0.447901  | 0.180252 | 0.43143  | 0.003087 | 0.026377         |
| 24     | -1.88896  | 0.636629 | 0.431409 | 0.003088 | 0.024191         |
| 46     | -1.79519  | 0.638079 | 0.424707 | 0.003639 | 0.02631          |
| 199    | 0.087913  | 0.334197 | 0.421289 | 0.003951 | 0.026529         |
| 35     | -1.50633  | 0.544188 | 0.41502  | 0.004586 | 0.028737         |
| 96     | -1.22076  | 0.565106 | 0.410612 | 0.005084 | 0.029866         |
| 36     | -1.28381  | 0.530343 | 0.408184 | 0.005378 | 0.029734         |
| 19     | -0.96077  | 0.465134 | 0.404499 | 0.005852 | 0.030559         |
| 62     | -0.84496  | 0.474401 | 0.394108 | 0.00739  | 0.036561         |
| 17     | -1.02856  | 0.463191 | 0.390478 | 0.008004 | 0.037621         |
| 61     | -0.68674  | 0.438361 | 0.386336 | 0.008759 | 0.039205         |
| 34     | -1.14886  | 0.540344 | 0.382083 | 0.009596 | 0.041001         |
| 53     | -0.89422  | 0.496048 | 0.381115 | 0.009796 | 0.040035         |
| 27     | -1.86349  | 0.606727 | 0.380995 | 0.009821 | 0.038465         |
| 60     | 0.875561  | 0.154045 | 0.379947 | 0.010042 | 0.037758         |
| 164    | 0.577487  | 0.16729  | 0.371421 | 0.012004 | 0.043398         |
| 141    | -0.71498  | 0.477666 | 0.365454 | 0.013564 | 0.047223         |
| 152    | 0.939831  | 0.210189 | 0.363943 | 0.013986 | 0.046951         |
| 163    | 0.655928  | 0.163255 | 0.363371 | 0.014148 | 0.045859         |
| 100    | 0.762834  | 0.196541 | 0.362433 | 0.014418 | 0.045175         |
| 128    | -0.2148   | 0.322358 | 0.354786 | 0.016785 | 0.050898         |
| 121    | 0.520057  | 0.200636 | 0.352019 | 0.01772  | 0.052052         |
| 119    | -0.27401  | 0.359581 | 0.348857 | 0.018841 | 0.053667         |
| 23     | -1.07852  | 0.482196 | 0.347612 | 0.019298 | 0.053354         |
| 98     | -0.37102  | 0.359561 | 0.344479 | 0.020491 | 0.055033         |
| 97     | -0.4064   | 0.409094 | 0.342574 | 0.021246 | 0.055476         |
| 157    | 0.269153  | 0.29798  | 0.342022 | 0.021469 | 0.054544         |
| 150    | 0.352913  | 0.307553 | 0.338987 | 0.022732 | 0.056231         |
| 127    | -0.54111  | 0.409477 | 0.338848 | 0.022791 | 0.054932         |
| 45     | -0.57095  | 0.417832 | 0.334586 | 0.024672 | 0.05798          |
| 102    | 0.980778  | 0.171897 | 0.331301 | 0.026209 | 0.06009          |
| 79     | -0.14799  | 0.3471   | 0.310187 | 0.038108 | 0.085288         |
| 82     | 0.052491  | 0.324576 | 0.30693  | 0.040286 | 0.088068         |
| 189    | 1.014369  | 0.163286 | 0.302304 | 0.043555 | 0.09305          |
| 130    | 0.17024   | 0.271503 | 0.298138 | 0.046681 | 0.097511         |
| 33     | -0.41963  | 0.36732  | 0.296847 | 0.047686 | 0.097445         |
| 64     | 0.832397  | 0.215139 | 0.292918 | 0.050852 | 0.101703         |
| 177    | 0.68953   | 0.224466 | 0.289388 | 0.05384  | 0.105436         |
| 110    | 0.550679  | 0.204127 | 0.285383 | 0.057399 | 0.110112         |
| 167    | 0.788331  | 0.226619 | 0.28109  | 0.061421 | 0.115471         |
| 78     | 3.067248  | -0.26685 | -0.27665 | 0.065813 | 0.121303         |
| 101    | 1.012948  | 0.143758 | 0.275222 | 0.067278 | 0.121618         |
| 148    | 1.078374  | 0.165111 | 0.265403 | 0.078065 | 0.138454         |
| 6      | 0.032885  | 0.272435 | 0.264494 | 0.079128 | 0.137742         |
| 168    | 0.898293  | 0.219136 | 0.253129 | 0.093405 | 0.159637         |
| 183    | 0.832597  | 0.222449 | 0.251811 | 0.095182 | 0.159769         |
| 138    | 0.730107  | 0.189905 | 0.242352 | 0.108711 | 0.179277         |
| 39     | 0.110908  | 0.267274 | 0.242111 | 0.109074 | 0.176774         |
| 137    | 0.760683  | 0.216986 | 0.22294  | 0.14101  | 0.224661         |
| 57     | 1.102008  | 0.098214 | 0.222604 | 0.141626 | 0.221881         |
| 37     | 0.221808  | 0.247838 | 0.219397 | 0.147601 | 0.227451         |
| 166    | 1.212657  | 0.115969 | 0.211303 | 0.163509 | 0.247901         |
| 188    | 1.368116  | 0.115497 | 0.20981  | 0.166574 | 0.248539         |
| 135    | 2.592735  | -0.10284 | -0.20351 | 0.179979 | 0.264345         |

|     |          |          |          |          |          |
|-----|----------|----------|----------|----------|----------|
| 139 | 0.426192 | 0.268411 | 0.197899 | 0.192533 | 0.278432 |
| 74  | 1.224526 | 0.109895 | 0.194044 | 0.201518 | 0.28701  |
| 182 | 1.099849 | 0.145828 | 0.182077 | 0.231277 | 0.324479 |
| 40  | 0.68178  | 0.177389 | 0.181572 | 0.232596 | 0.32153  |
| 115 | 0.800081 | 0.198663 | 0.168365 | 0.268918 | 0.366352 |
| 186 | 1.11761  | 0.158033 | 0.159118 | 0.296472 | 0.398119 |
| 165 | 1.116726 | 0.129512 | 0.154939 | 0.309503 | 0.409765 |
| 124 | 0.854896 | 0.171789 | 0.153808 | 0.31309  | 0.408756 |
| 38  | 0.971657 | 0.143042 | 0.145245 | 0.341109 | 0.439236 |
| 198 | 1.256553 | 0.124437 | 0.141306 | 0.354502 | 0.450314 |
| 132 | 1.200375 | 0.106656 | 0.13834  | 0.364796 | 0.457211 |
| 142 | 1.166573 | 0.119685 | 0.135822 | 0.373673 | 0.462175 |
| 75  | 1.368112 | 0.090863 | 0.132099 | 0.387034 | 0.472483 |
| 32  | 1.474719 | 0.089241 | 0.131514 | 0.389158 | 0.468985 |
| 107 | 1.21624  | 0.110004 | 0.126143 | 0.408981 | 0.486636 |
| 184 | 1.402998 | 0.084757 | 0.12568  | 0.410717 | 0.482592 |
| 185 | 1.613441 | 0.048469 | 0.118675 | 0.437486 | 0.507699 |
| 162 | 1.533433 | 0.056729 | 0.112235 | 0.46293  | 0.530676 |
| 187 | 2.325512 | -0.08696 | -0.09936 | 0.516093 | 0.584491 |
| 200 | 1.464725 | 0.084571 | 0.097506 | 0.523991 | 0.586371 |
| 31  | 1.45292  | 0.07321  | 0.096638 | 0.527709 | 0.583584 |
| 16  | 1.434488 | 0.086359 | 0.095095 | 0.534354 | 0.584062 |
| 144 | 1.630874 | 0.036285 | 0.070556 | 0.645115 | 0.69702  |
| 143 | 2.150469 | -0.03236 | -0.04742 | 0.757089 | 0.808709 |
| 140 | 2.057212 | -0.01696 | -0.02584 | 0.866204 | 0.914867 |
| 117 | 1.84915  | 0.013779 | 0.019437 | 0.899154 | 0.939117 |
| 77  | 1.845649 | 0.01243  | 0.019417 | 0.899259 | 0.928905 |
| 76  | 1.894375 | 0.0056   | 0.007634 | 0.960303 | 0.98118  |
| 116 | 1.912649 | 0.001895 | 0.002941 | 0.984702 | 0.99529  |
| 59  | 1.913286 | 0.000995 | 0.002333 | 0.987865 | 0.987865 |

**Supplementary Table S6. Linear fit parameters for DI versus CDR SOB for all investigated VOIs.**  $r$  is the Pearson's  $r$ ,  $p$  is the uncorrected  $p$ -value,  $p_{FDR}$  is the  $p$ -value after FDR correction. Significant correlations ( $p < 0.05$ ) are shown in italics, correlations that remained significant after FDR correction ( $p_{FDR} < 0.05$ ) are shown in bold. The regions are sorted according to their  $p$ -value.
